# Supplementary material
Source: Springer Nature journal article supplement (https://www.springermedizin.de/resource/supplementary/12968_2008_57_MOESM8_ESM.pdf/9577892)

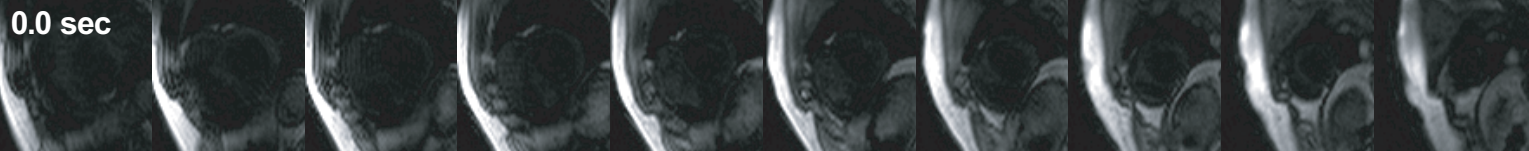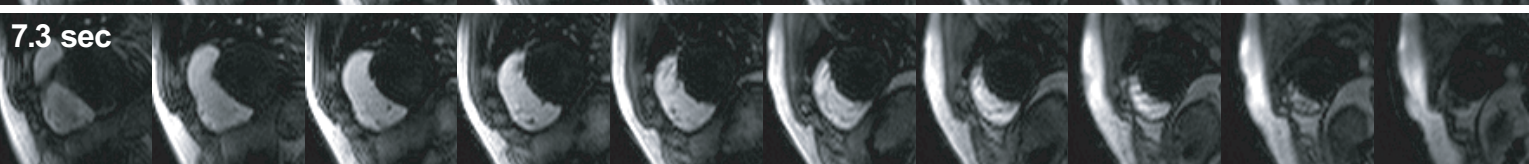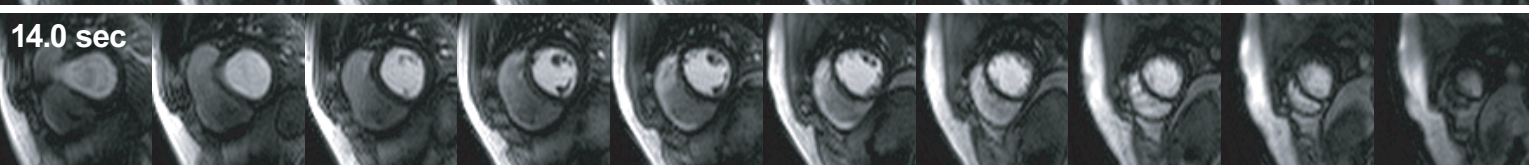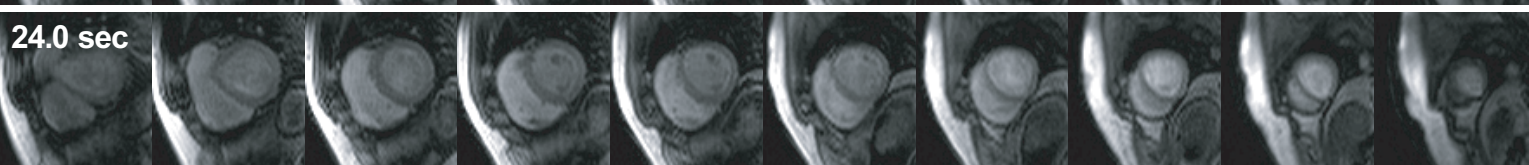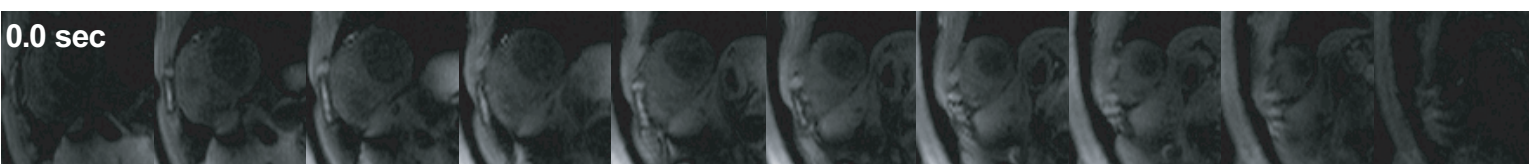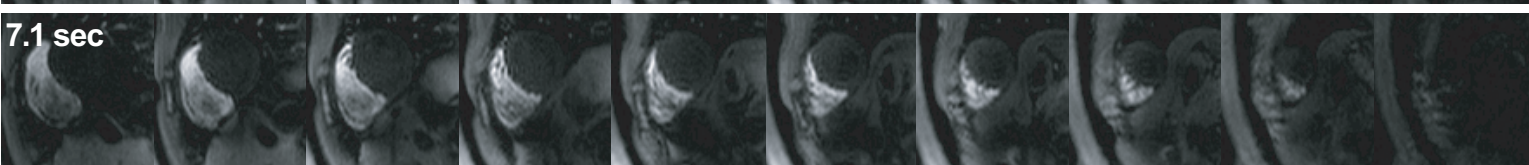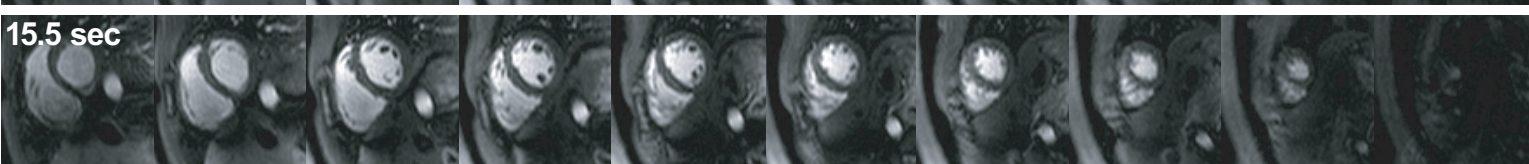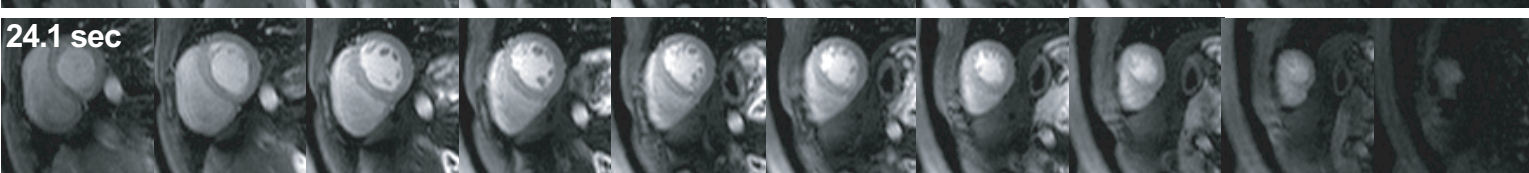

Supplement: MOESM8 [file 9577892]
